# Supplementary material for: Predicting mutually exclusive spliced exons based on exon length, splice site and reading frame conservation, and exon sequence homology
Source: Springer Nature journal article supplement (doi:10.1186/1471-2105-12-270), 2011-06-30

## Search for non-mutually exclusive exons sharing similar length, same reading frame and sequence homology

All genes of the *Drosophila melanogaster* X chromosome containing at least two exons were collected based on the FlyBase annotation version 5.27. In all transcripts of the 1,705 genes neighboring exons were identified, which code for at least fifteen amino acids (minimal length 15aa), share high similarity (score  $\geq 15\%$ ), have similar length (length difference  $\leq 20$ aa) and are in the same reading frame. The following table shows the six genes, which contain 21 of those exons distributed in 8 clusters. The figures show the detailed gene structure of those genes. The arrows indicate the length differences and scores of the similar exons.

| Gene Name                    | Flybase ID  | Exon hits per gene | Clusters per gene | Score % | Length difference [aa] |
|------------------------------|-------------|--------------------|-------------------|---------|------------------------|
| C901                         | FBgn0021742 | 2                  | 1                 | 51 – 59 | 11                     |
| CG15570                      | FBgn0029697 | 5                  | 2                 | 32 – 38 | 2 – 3                  |
| Ciboulot                     | FBgn0026084 | 2                  | 1                 | 30 – 35 | 8                      |
| Megalin                      | FBgn0261260 | 2                  | 1                 | 22      | 6                      |
| Tenascin accessory           | FBgn0259240 | 3                  | 1                 | 27 – 36 | 5 – 8                  |
| Terribly reduced optic lobes | FBgn0261451 | 7                  | 2                 | 17 – 30 | 3 – 6                  |
| All 6 genes                  |             | 21                 | 8                 | 17 – 59 | 2 – 11                 |

Gene: C901, FBgn0021742

Polypeptide: C901-PA, FBpp0073256

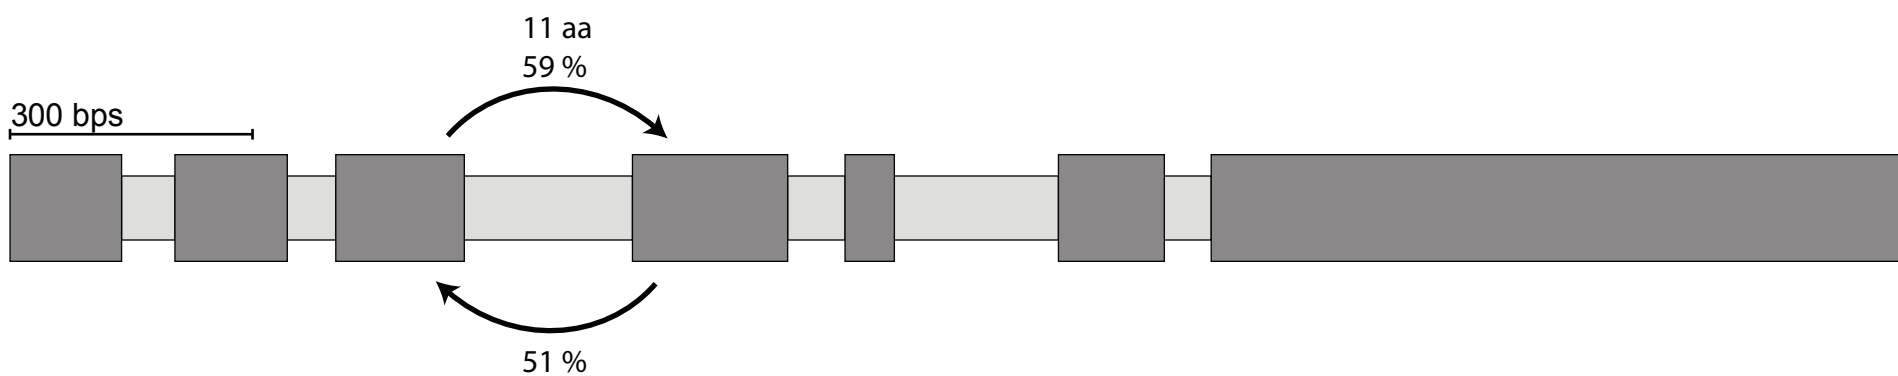

Gene: CG15570, FBgn0029697

Polypeptide: CG15570-PA, FBpp0070613

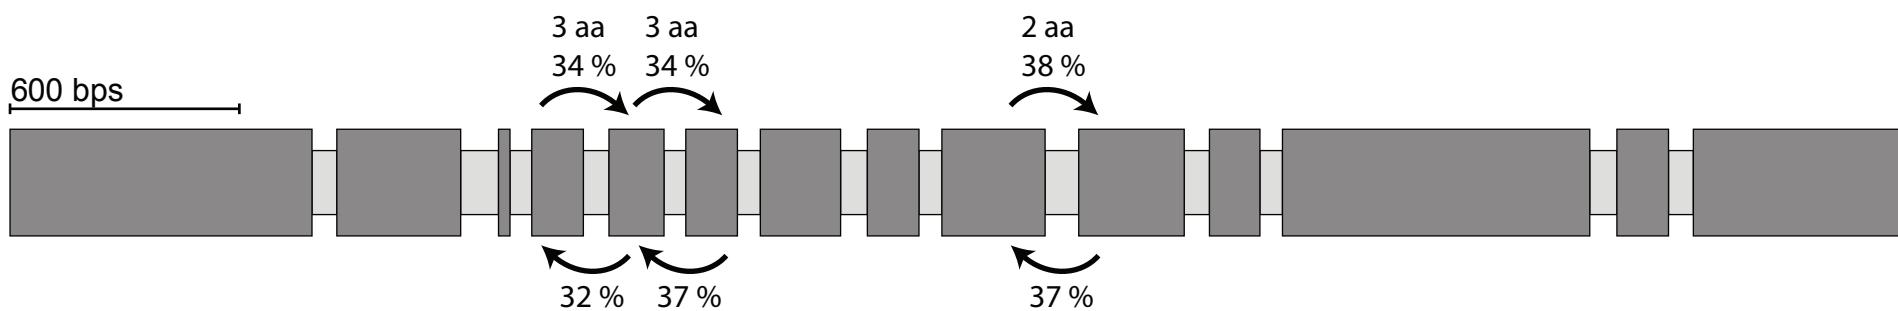

Gene: Ciboulot, FBgn0026084

Polypeptide: cib-PA, FBpp0070607

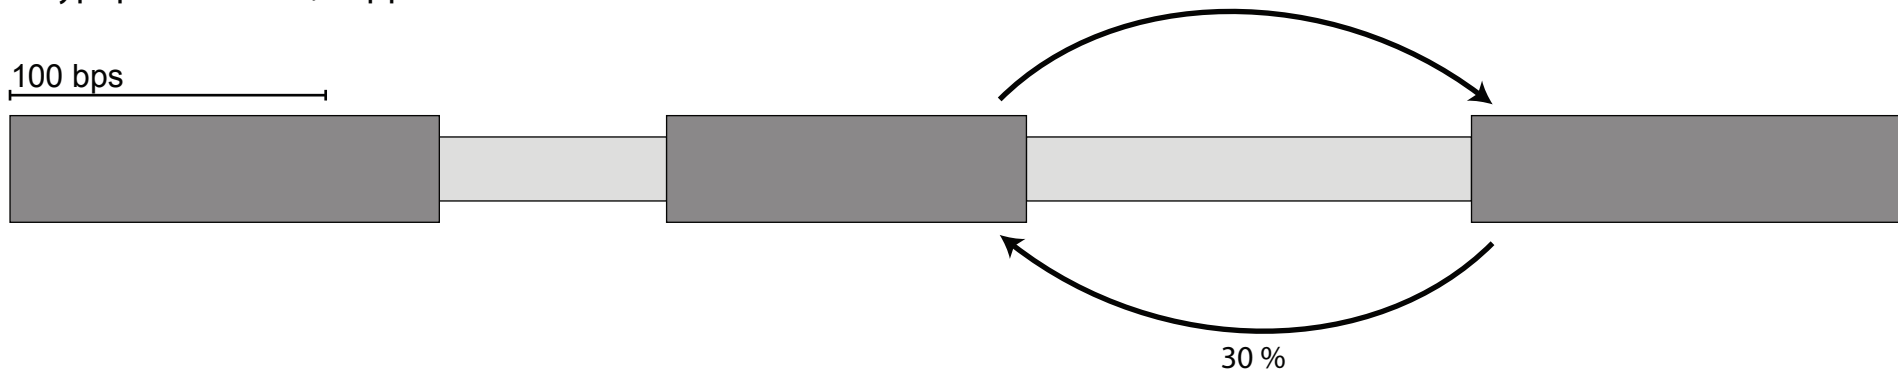

Gene: Megalin, FBgn0261260

Polypeptide: Megalin-PA, FBpp0291363

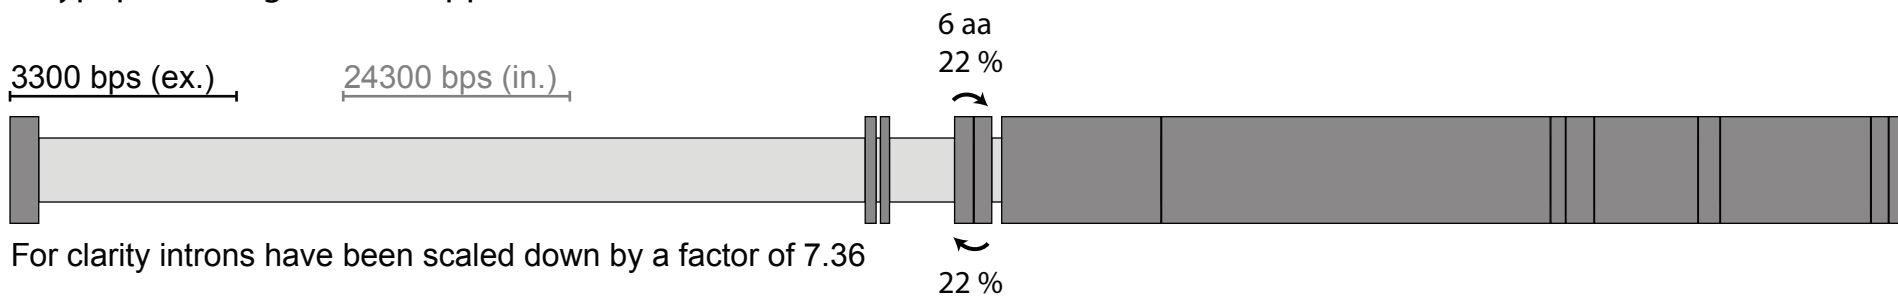

Gene: Tenascin accessory, FBgn0259240

Polypeptide: Ten-a-PD, FBpp0289136

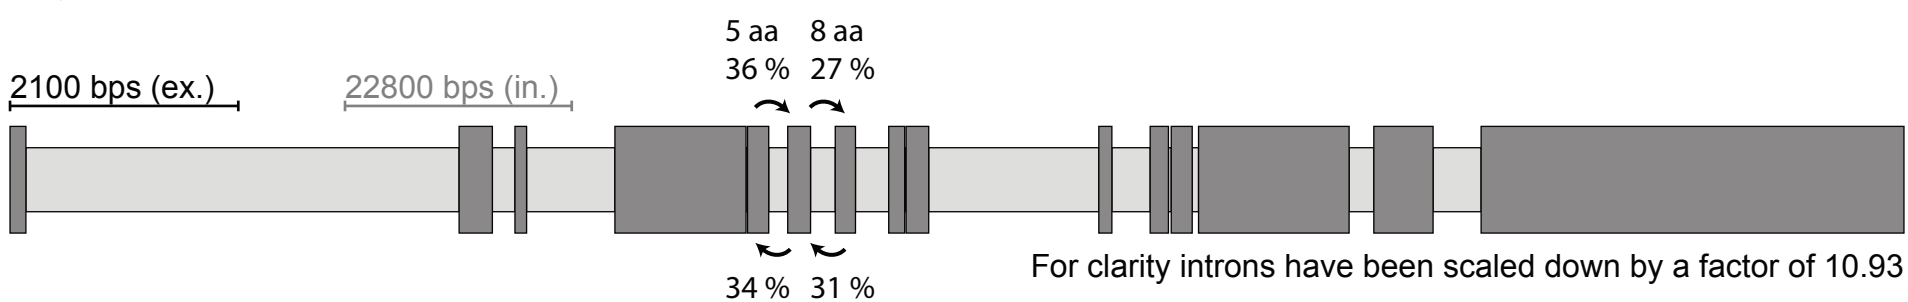

Gene: Terribly reduced optic lobes, FBgn0261451

Polypeptide: trol-PD, FBpp0070440

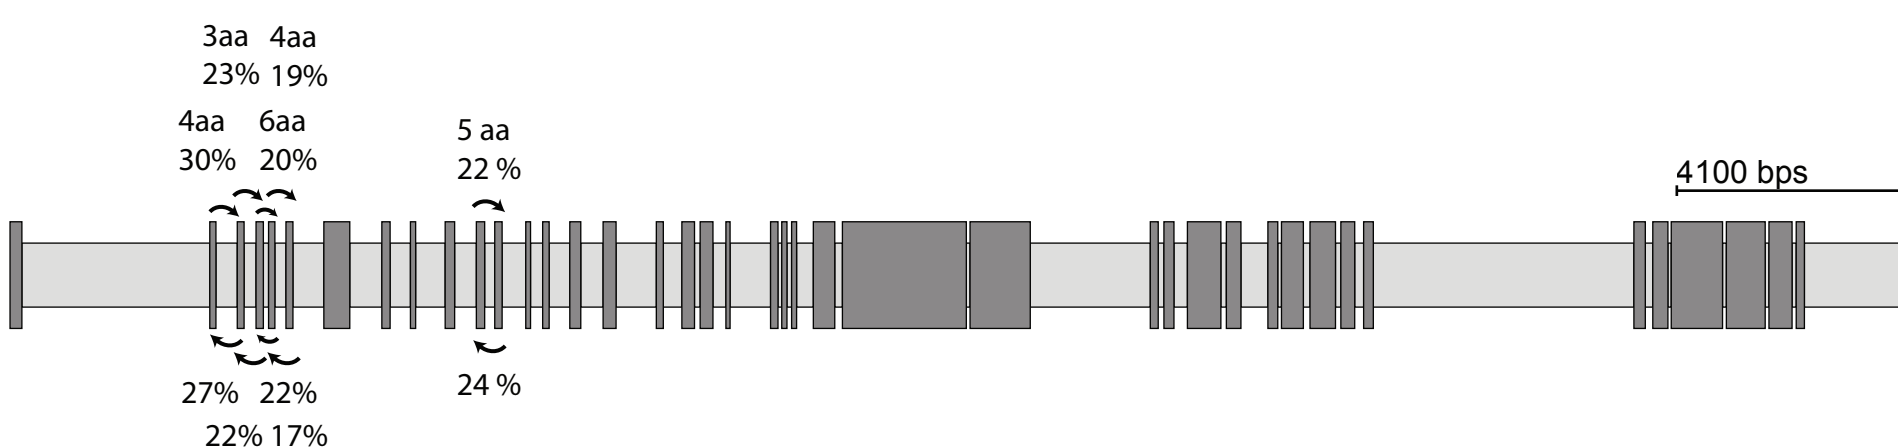

Supplement: Additional file 2 [file 1471-2105-12-270-s2.pdf]
